# Supplementary material for: Influence of hypertension classification on hypertensive intracerebral hemorrhage location
Source: PubMed Central journal article supplement (PMC8630601; doi:10.1111/jch.14367), 2021-10-05
Supplement: JCH-23-1992-s001.pdf [file JCH-23-1992-s001.pdf]

## 苏州大学附属第一医院医学伦理委员会

### 回顾性研究便捷审核表

审核编号: (2021) 伦研批第 123 号

|             |                                                                                                                                                                                                                            |       |    |
|-------------|----------------------------------------------------------------------------------------------------------------------------------------------------------------------------------------------------------------------------|-------|----|
| 研究项目名称      | 高血压分级对脑出血部位的影响                                                                                                                                                                                                             |       |    |
| 研究类别        | 回顾性研究                                                                                                                                                                                                                      |       |    |
| 项目来源        | 无                                                                                                                                                                                                                          |       |    |
| 项目科室        | 急诊科                                                                                                                                                                                                                        | 项目负责人 | 徐峰 |
| 主要研究者       | 沈军, 徐峰, 杨鹏                                                                                                                                                                                                                 |       |    |
| 便捷审查内容      | 从病例数据库中导出 2019 年 11 月 30 日-2020 年 10 月 31 日的高血压脑出血患者临床相关数据并进行统计分析, 探讨高血压分级是否是脑叶及非脑叶型高血压出血患者的危险因素。所有数据将经过患者个人隐私信息严格脱敏。                                                                                                      |       |    |
| 科研立项审查意见    | 同意立项。<br>签名: 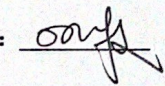 2021 年 5 月 12 日                                                                                                           |       |    |
| 便捷审查意见      | 经伦理委员会审核, 该申报项目为回顾性临床研究, 研究方案设计科学, 符合伦理原则。                                                                                                                                                                                 |       |    |
| 伦理委员会审核委员签字 | <br>委员:  苏州大学附属第一医院医学伦理委员会 (盖章)<br>2021 年 5 月 12 日 |       |    |

附件 1: 文章或研究方案

附件 2: 科研诚信承诺书
